# Supplementary material for: Fundamentals and new approaches to calibration in atomic spectrometry
Source: Royal Society of Chemistry journal article supplement (doi:10.1039/c9ja00273a), 2019-01-01
Supplement: c9ja00273a1.pdf [file c9ja00273a1.pdf]

## Supplementary Material

### Fundamentals and new approaches to calibration in atomic spectrometry

George L. Donati and Renata S. Amais

#### Estimation of linear function coefficients by least-squares regression

Eqn (S1) represents the linear relationship between the instrument response for an individual measurement,  $y_i$ , and its respective analyte concentration,  $x_i$ .

$$y_i = \beta_0 + \beta_1 x_i + \varepsilon_i \quad (\text{S1})$$

where  $\beta_0$  and  $\beta_1$ , are the  $y$ -intercept and slope of the calibration curve, and  $\varepsilon_i$  represents the difference (also known as residual) between an individual experimental value,  $y_i$ , and the expected instrument response,  $\hat{y}$ , according to the linear regression equation.

In least-squares regression, one seeks to minimize the difference between each experimental point and its corresponding expected value. The residual can be positive or negative, *i.e.* the experimental value can be larger or smaller than the expected one. Therefore, it is more convenient to minimize the square of the residual,  $\varepsilon_i^2$ . Hence, the “best” regression line will be the one for which the sum of the squares of the residuals,  $S$ , is closest to zero (*i.e.*  $S = \sum \varepsilon_i^2 \rightarrow 0$ ).<sup>S1</sup>

The values for  $\beta_0$  and  $\beta_1$  are unknown. Even more difficult to determine is  $\varepsilon_i$ , as it varies with each measurement.<sup>S1,S2</sup> However, estimates of slope ( $m$ ) and intercept ( $b$ ) can be obtained following the deduction presented below.

$$\varepsilon_i = y_i - \beta_0 - \beta_1 x_i \quad (\text{S2})$$

$$\sum_i^n \varepsilon_i = \sum_i^n (y_i - \beta_0 - \beta_1 x_i) \quad (\text{S3})$$

$$S = \sum_i^n \varepsilon_i^2 = \sum_i^n (y_i - \beta_0 - \beta_1 x_i)^2 \quad (\text{S4})$$

To minimize the differences between each  $(y_i, \hat{y})$  pair, we need to minimize the sum of the squares of the residuals ( $S$ ). If we take the partial derivative of eqn (S4) in function of  $\beta_0$  and  $\beta_1$ , and make it equal to zero, we can estimate the values of  $b$  (estimate of  $\beta_0$ ) and  $m$  (estimate of  $\beta_1$ ) that will lead to the lowest  $S$ . For estimating  $b$ :

$$\frac{\partial S}{\partial \beta_0} = -2 \sum_i^n (y_i - \beta_0 - \beta_1 x_i) = 0 \quad (\text{S5})$$

We can then replace  $\beta_0$  and  $\beta_1$  with  $b$  and  $m$ , and divide both sides of eqn (S5) by the total number of measurements,  $n$ .

$$\frac{\sum_i^n y_i}{n} - \frac{b}{n} - \frac{m \sum_i^n x_i}{n} = \frac{0}{n} \quad (\text{S6})$$

Because  $\frac{\sum_i^n y_i}{n} = \bar{y}$  and  $\frac{\sum_i^n x_i}{n} = \bar{x}$ , eqn (S6) becomes:

$$\begin{aligned} \bar{y} - b - m\bar{x} &= 0 \\ b &= \bar{y} - m\bar{x} \end{aligned} \quad (\text{S7})$$

where  $\bar{x}$  and  $\bar{y}$  are the average values for analyte concentration and instrument response.

The same way, to estimate  $m$ :

$$\frac{\partial S}{\partial \beta_1} = -2 \sum_i^n x_i (y_i - \beta_0 - \beta_1 x_i) = 0 \quad (\text{S8})$$

$$\sum_i^n x_i y_i - b \sum_i^n x_i - m \sum_i^n x_i^2 = 0 \quad (\text{S9})$$

Substituting eqn (S7) in eqn (S9):

$$\begin{aligned} \sum_i^n x_i y_i - (\bar{y} - m\bar{x}) \sum_i^n x_i - m \sum_i^n x_i^2 &= 0 \\ \sum_i^n x_i y_i - \bar{y} \sum_i^n x_i + m\bar{x} \sum_i^n x_i - m \sum_i^n x_i^2 &= 0 \\ \sum_i^n x_i y_i - \bar{y} \sum_i^n x_i - m \left( -\bar{x} \sum_i^n x_i + \sum_i^n x_i^2 \right) &= 0 \\ \sum_i^n x_i y_i - \bar{y} \sum_i^n x_i &= m \left( -\bar{x} \sum_i^n x_i + \sum_i^n x_i^2 \right) \end{aligned} \quad (\text{S10})$$

Because  $\sum_i^n x_i = n\bar{x}$ , eqn (S10) becomes:

$$\begin{aligned} \sum_i^n x_i y_i - n\bar{x}\bar{y} &= m \left( \sum_i^n x_i^2 - n\bar{x}\bar{x} \right) \\ \sum_i^n x_i y_i - n\bar{x}\bar{y} &= m \left( \sum_i^n x_i^2 - n\bar{x}^2 \right) \end{aligned} \quad (\text{S11})$$

Now, we just need to prove eqns (S12) and (S13), and use them to simplify eqn (S11).

$$\sum_i^n (x_i - \bar{x})^2 = \sum_i^n x_i^2 - n\bar{x}^2 \quad (\text{S12})$$

$$\sum_i^n (x_i - \bar{x})(y_i - \bar{y}) = \sum_i^n x_i y_i - n\bar{x}\bar{y} \quad (\text{S13})$$

**Proof of eqn (S12)**

$$\sum_i^n (x_i - \bar{x})^2 = \sum_i^n x_i^2 - 2\bar{x} \sum_i^n x_i + n\bar{x}^2$$

$$\sum_i^n x_i$$

Remember that  $\frac{\sum_i^n x_i}{n} = \bar{x}$ , therefore:

$$\sum_i^n (x_i - \bar{x})^2 = \sum_i^n x_i^2 - 2\bar{x}n\bar{x} + n\bar{x}^2 = \sum_i^n x_i^2 - 2n\bar{x}^2 + n\bar{x}^2$$

$$\sum_i^n (x_i - \bar{x})^2 = \sum_i^n x_i^2 - n\bar{x}^2$$

**Proof of eqn (S13)**

$$\sum_i^n (x_i - \bar{x})(y_i - \bar{y}) = \sum_i^n x_i y_i - \bar{y} \sum_i^n x_i - \bar{x} \sum_i^n y_i + n\bar{x}\bar{y}$$

$$\sum_i^n x_i$$

$$\sum_i^n y_i$$

Again,  $\frac{\sum_i^n x_i}{n} = \bar{x}$  and  $\frac{\sum_i^n y_i}{n} = \bar{y}$ , therefore:

$$\sum_i^n (x_i - \bar{x})(y_i - \bar{y}) = \sum_i^n x_i y_i - \bar{y}n\bar{x} - n\bar{x}\bar{y} + n\bar{x}\bar{y}$$

$$\sum_i^n (x_i - \bar{x})(y_i - \bar{y}) = \sum_i^n x_i y_i - n\bar{x}\bar{y}$$

Finally, from eqns (S11), (S12) and (S13):

$$m = \frac{\sum_i^n x_i y_i - n\bar{x}\bar{y}}{\left(\sum_i^n x_i^2 - n\bar{x}^2\right)}$$

$$m = \frac{\sum_i^n (x_i - \bar{x})(y_i - \bar{y})}{\sum_i^n (x_i - \bar{x})^2}$$

(S14)

## References

S1. D. L. Massart, B. G. M. Vandeginste, L. M. C. Buydens, S. De Jong, P. J. Lewi and J. Smeyers-Verbeke, *Handbook of Chemometrics and Qualimetrics: Part A*, Ch. 8, Straight Line Regression and Calibration, Elsevier, Amsterdam, 1997, pp. 171-230.

S2. N. R. Draper and H. Smith, *Applied Regression Analysis*, 2nd ed., John Wiley & Sons, New York, 1981, 709p.
